# Supplementary material for: Ion adsorption on the inner surface of single-walled carbon nanotubes used as electrodes for electric double-layer capacitors
Source: Royal Society of Chemistry journal article supplement (doi:10.1039/c2cp43011h), 2012-01-01
Supplement: c2cp43011h.pdf [file c2cp43011h.pdf]

**Electronic Supplementary Information (ESI)**

**Ion adsorption on the Inner surface of Single-walled Carbon Nanotubes  
used as Electrodes for Electric Double-Layer Capacitors**

**Ayar Al-zubaidi,<sup>a</sup> Tsuyoshi Inoue,<sup>a</sup> Tomohiro Matsushita,<sup>a</sup> Yosuke Ishii<sup>a</sup> and Shinji Kawasaki<sup>\*a</sup>**

<sup>a</sup> Department of Materials Science and Engineering, Nagoya Institute of Technology, Gokiso-cho,  
Showa-ku, Nagoya, Aichi, 466-8555 Japan. Tel: +81-52-735-5221 Fax: +81-52-735-5221

\* Corresponding Author email: [kawasaki.shinji@nitech.ac.jp](mailto:kawasaki.shinji@nitech.ac.jp)

## Table of contents

| Content                                                                                                                                                                                | Page |
|----------------------------------------------------------------------------------------------------------------------------------------------------------------------------------------|------|
| Figure S1. XRD for sample (A) SWCNTs                                                                                                                                                   | S3   |
| Figure S2. XRD for sample (B) SWCNTs                                                                                                                                                   | S3   |
| Figure S3. Kataura plot                                                                                                                                                                | S3   |
| Figure S4. Raman spectra for open-end A and B SWCNTs                                                                                                                                   | S4   |
| Figure S5. Nitrogen adsorption isotherms for A SWCNTs                                                                                                                                  | S4   |
| Figure S6. Nitrogen adsorption isotherms for B SWCNTs                                                                                                                                  | S4   |
| Figure S7. Cyclic Voltammogram Cyclic Voltammograms depicting current (I) at scan rates (v) of 5, 10, 20, 50, and 100 mV/s. for closed-end sample A SWCNTs in TEMABF <sub>4</sub> /PC. | S5   |
| Figure S8. Cyclic Voltammogram Cyclic Voltammograms depicting current (I) at scan rates (v) of 5, 10, 20, 50, and 100 mV/s. for open-end sample A SWCNTs in TEMABF <sub>4</sub> /PC.   | S5   |
| Table S1: The Brunauer–Emmett–Teller (BET) surface area of the SWCNT samples used                                                                                                      | S5   |
| Table S2: The total ohmic resistance for both types of SWCNTs                                                                                                                          | S6   |

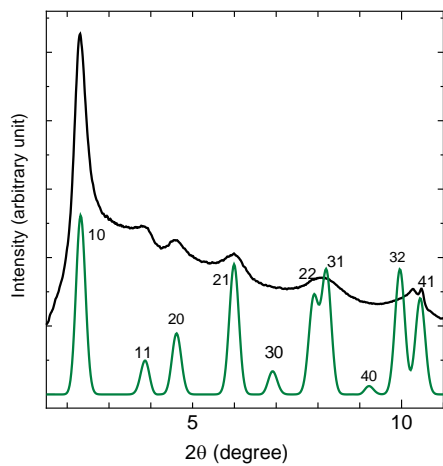

Figure S1. XRD for sample (A) SWCNTs

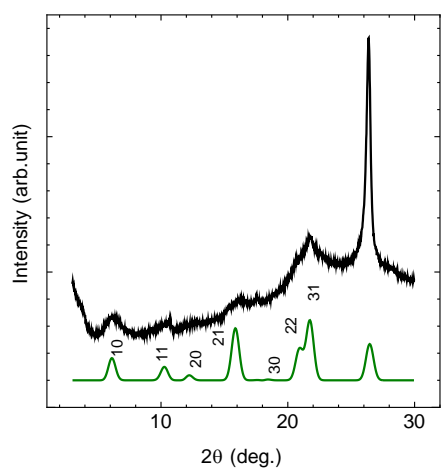

Figure S2. XRD for sample (B) SWCNTs

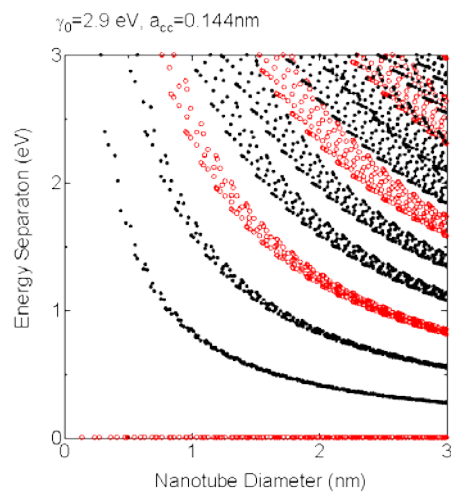

Figure S3. Kataura plot

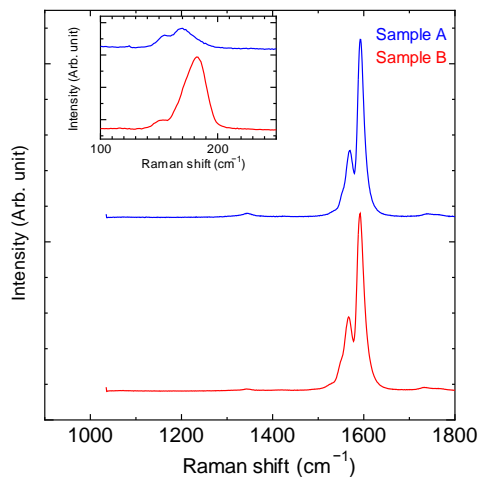

Figure S4. Raman spectra for open-end A and B SWCNTs

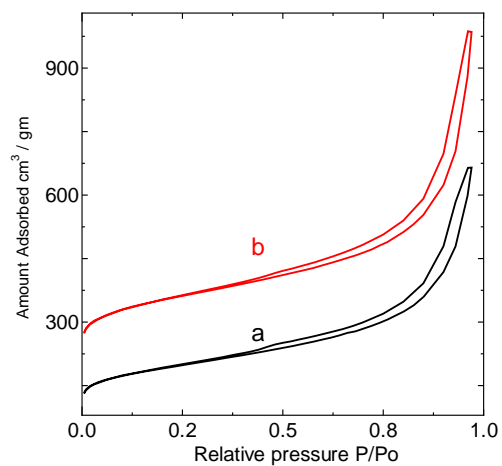

Figure S5. Nitrogen adsorption isotherms for A SWCNTs (a) closed-end (b) open-end

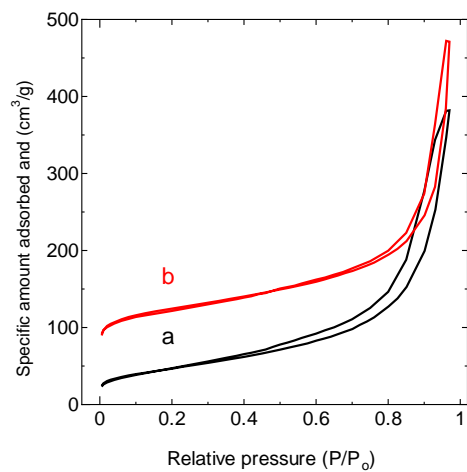

Figure S6. Nitrogen adsorption isotherms for B SWCNTs (a) closed-end (b) open-end

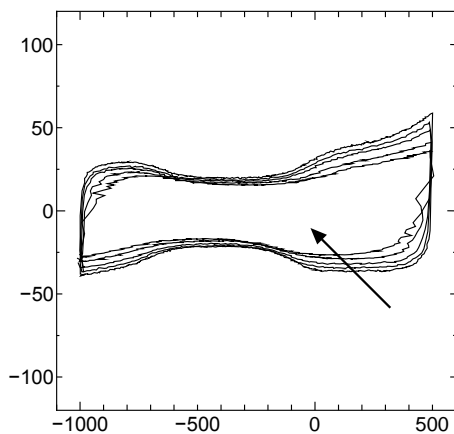

Figure S7. Cyclic Voltammograms depicting current (I) at scan rates ( $v$ ) of 5, 10, 20, 50, and 100 mV/s for closed-end sample A SWCNTs in TEMABF<sub>4</sub>/PC.

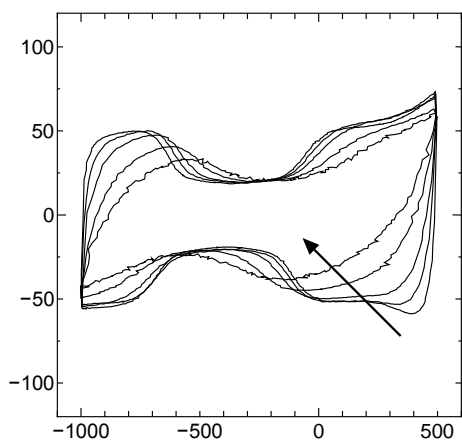

Figure S8. Cyclic Voltammograms depicting current (I) at scan rates ( $v$ ) of 5, 10, 20, 50, and 100 mV/s for open-end sample A SWCNTs in TEMABF<sub>4</sub>/PC.

**Table S1.** The Brunauer–Emmett–Teller (BET) surface area of the SWCNT samples used

|                                      |            |          |
|--------------------------------------|------------|----------|
| B                                    | Closed-end | Open-end |
| $S_{\text{BET}}$ [m <sup>2</sup> /g] | 169        | 400      |
| A                                    | Closed-end | Open-end |
| $S_{\text{BET}}$ [m <sup>2</sup> /g] | 629        | 1011     |

**Table S2.** The total ohmic resistance for both types of SWCNTs

|                  | H <sub>2</sub> SO <sub>4</sub> | NaCl  | TEMABF <sub>4</sub> /PC |
|------------------|--------------------------------|-------|-------------------------|
| Closed-end SWCNT | 0.005                          | 0.01  | 0.037                   |
| Open-end SWCNT   | 0.005                          | 0.028 | 0.055                   |
